# Supplementary material
Source: publisher figshare collection journal article supplement (https://acs.figshare.com/ndownloader/files/16334918)
Supplement: Supplementary file 1 [file 16334918]

# **Switchable Chiroptical Hot-Spots in Silicon Nanodisk Dimers**

Xin Zhao and Björn M. Reinhard

Department of Chemistry and The Photonics Center, Boston University, Boston, MA 02215,  
United States

**Supporting Information**

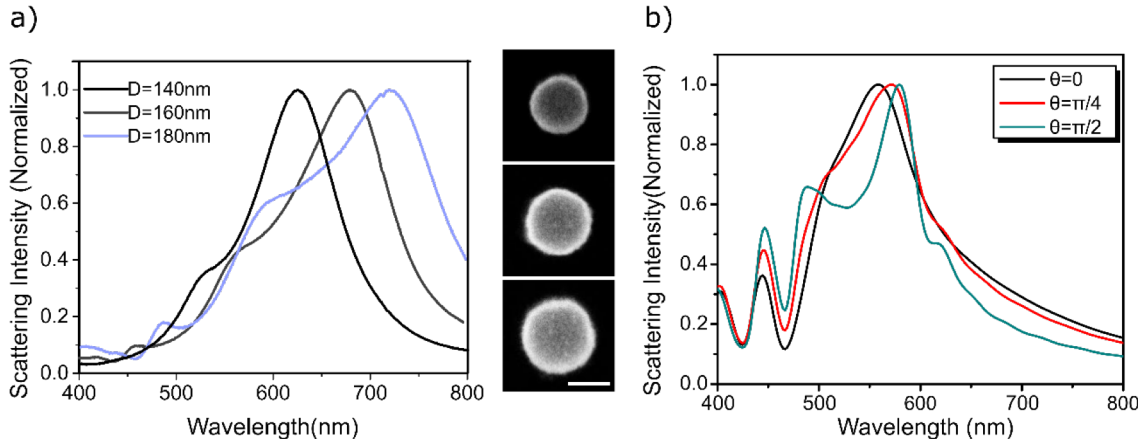

Figure S1. a) Experimental darkfield scattering spectra for Si nanodisk monomers ( $h = 150$  nm) with different diameters  $D$  fabricated on sapphire substrate. b) Simulated scattering spectra for free-standing (no substrate) silicon nanodisk dimer ( $D = 140$  nm,  $h = 100$  nm,  $g = 20$  nm) for different light polarization angles.

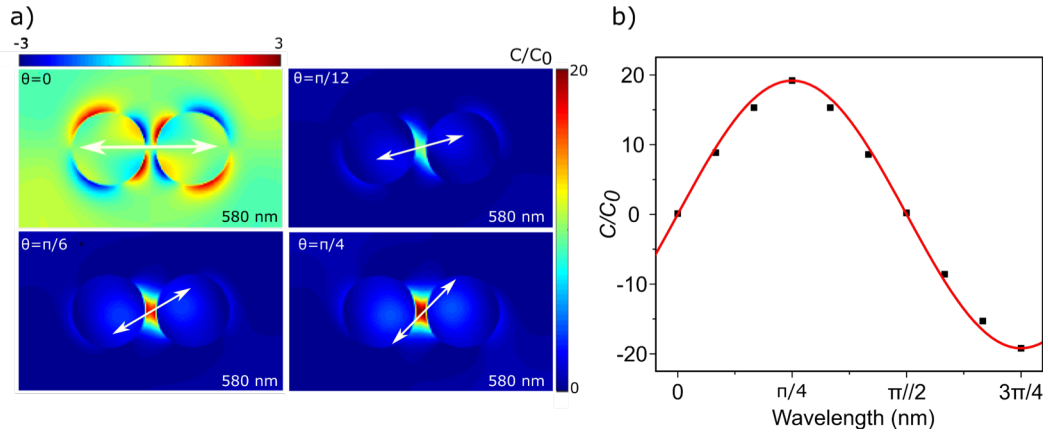

Figure S2. a) Effect of polarization angle on optical chirality enhancement. Simulated optical chirality enhancement  $C/C_0$  for Si nanodisk dimer ( $h = 100$  nm,  $g = 20$  nm,  $D = 140$  nm) with different polarization angles (clockwise top left to bottom left)  $\theta = 0, \pi/12, \pi/4, \pi/6$ . b) Plot of the calculated  $C/C_0$  (integrated over the gap area) as function of polarization angle  $\theta$ .

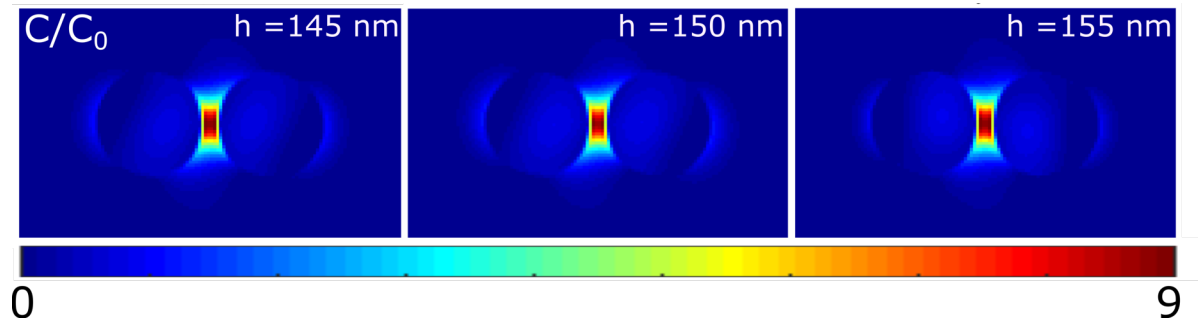

Figure S3. Height effect on optical chirality. Simulated optical chirality enhancement for  $D = 140$  nm,  $g = 20$  nm Si nanodisk dimers on sapphire substrate with different heights.

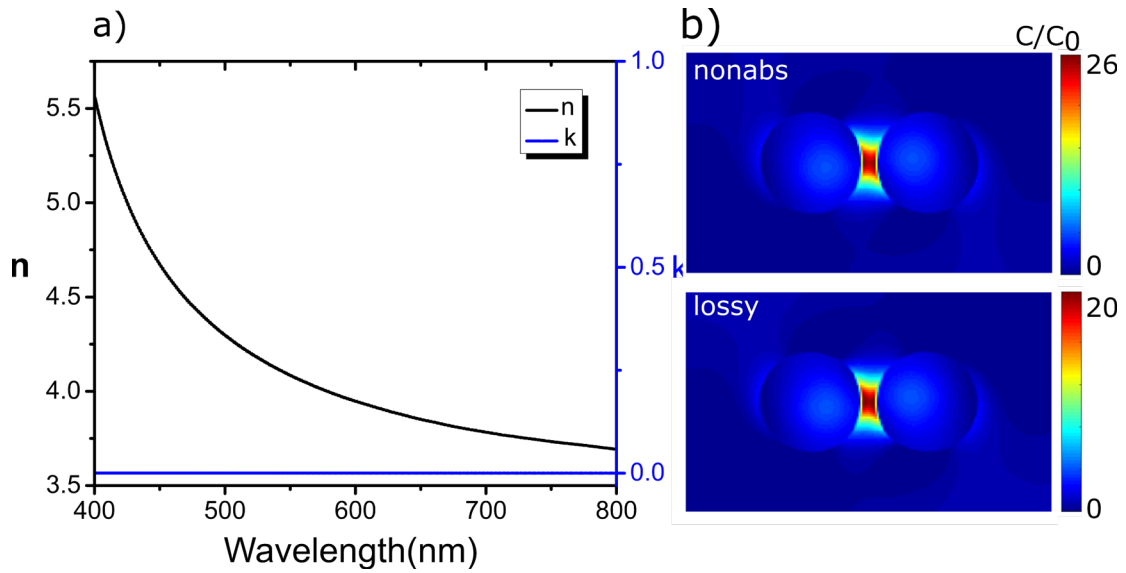

Figure S4. Simulated optical chirality enhancement by hypothetical non-absorbing Si. a) Wavelength-dependent refractive index. b) Optical chirality maps for non-absorbing dimers ( $h = 100$  nm,  $g = 20$  nm,  $D = 140$  nm) when in vacuum (upper) and a comparison of this  $C/C_0$  map with that for the “lossy” Si nanodisk dimer (bottom) shows a nearly identical spatial distribution of  $C$  enhancement with higher peak enhancement ( $C/C_0 = 26$  compared to  $C/C_0 = 20$ ).
